# Supplementary material for: Within-individual phenotypic plasticity in flowers fosters pollination niche shift
Source: PubMed Central journal article supplement (PMC7419554; doi:10.1038/s41467-020-17875-1), 2020-08-11
Supplement: 41467_2020_17875_MOESM2_ESM.pdf [file 41467_2020_17875_MOESM2_ESM.pdf]

This manuscript has been previously reviewed at another journal that is not operating a transparent peer review scheme. The manuscript was considered suitable for publication without further review at *Nature Communications*.
