# Supplementary material for: Within-individual phenotypic plasticity in flowers fosters pollination niche shift
Source: PubMed Central journal article supplement (PMC7419554; doi:10.1038/s41467-020-17875-1), 2020-08-11
Supplement: 41467_2020_17875_MOESM3_ESM.pdf [file 41467_2020_17875_MOESM3_ESM.pdf]

## **Descriptions of Additional Supplementary Files**

### **Supplementary Data 1.**

**Description:** Significantly Differential Expressed Genes (DEGs) sensu Trinity, with the logFold-Change (positive values indicate overexpression in summer), FDR adjusted P-values, and annotation with trinotate and Sma3s.

### **Supplementary Data 2.**

**Description:** Enrichment analysis of GO terms of the differential expressed genes. Over-represented (enriched) terms are indicated with + and under-represented (depleted) with -. BP= biological process; CC= cellular component; MF= molecular function.

### **Supplementary Data 3.**

**Description:** Number of Brassiceae species studied both in the field (in bold) and using data from the literature.

### **Supplementary Data 4.**

**Description:** Frequency of occurrence of each pollination functional group in each Brassiceae species. LTLB: Long-tongued large bees, STLB: short-tongued large bees, LTMB: Long-tongued medium-sized bees, LTXLB: Long-tongued extra-large bees, STSB: short-tongued small bees, STMB: shorttongued medium-sized bees, STLB: short-tongued large bees, STXLB: short-tongued extra-large bees, STXSB: short-tongued extra-small bees.

### **Supplementary Data 5.**

**Description:** Pollinator functional groups. Brief description of the functional groups of the insects visiting the flowers of the studied species.

### **Supplementary Data 6.**

**Description:** Pollinator Database. Database of the insects visiting the flowers of Brassiceae species. Both own data and data from the literature are included.
